# Supplementary material for: Microwave Heating Promotes the S-Alkylation of Aziridine Catalyzed by Molecular Sieves: A Post-Synthetic Approach to Lanthionine-Containing Peptides
Source: MDPI journal article supplement (doi:10.3390/molecules26206135), 2021-10-11
Supplement: s1 [file s1]

# Microwave heating promotes the S-Alkylation of Aziridine catalyzed by Molecular Sieves: post-synthetic approach to lanthionine-containing peptides

Valentina Verdoliva <sup>1,4</sup>, Giuseppe Digilio <sup>2</sup>, Michele Saviano <sup>3</sup>, Stefania De Luca <sup>1,\*</sup>

<sup>1</sup> *Institute of Biostructures and Bioimaging, National Research Council, 80134 Naples, Italy*

<sup>2</sup> *Department of Science and Technologic Innovation Università del Piemonte Orientale "A. Avogadro", 15121 Alessandria, Italy*

<sup>3</sup> *Institute of Crystallography, National Research Council, 70126 Bari, Italy*

<sup>4</sup> *Department of Environmental, Biological and Pharmaceutical Sciences and Technologies, University of Campania "Luigi Vanvitelli", Via Vivaldi 43, 81100 Caserta, Italy.*

## Supporting Information

|           |                              |           |
|-----------|------------------------------|-----------|
| <b>2.</b> | <b>HPLC, MS, NMR Spectra</b> | <b>S2</b> |
|           | Compound 1a.....             | S2        |
|           | Compound 2a.....             | S3        |
|           | Compound 3a.....             | S4        |
|           | Compound 4a.....             | S5        |
|           | Compound 5a.....             | S6        |
|           | Compound 6a.....             | S7        |
| <br>      |                              |           |
| <b>3.</b> | <b>Abbreviations</b>         | <b>S9</b> |

# Compound 1a strategy A

## AcLanGlyValAlaNH<sub>2</sub>

### A. HPLC profile of the reaction crude product:

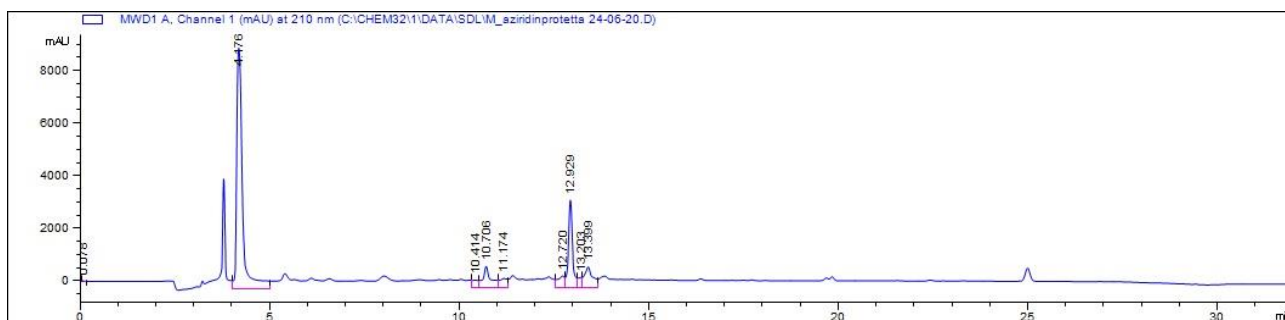

### B. MS spectrum of **1a** after purification:

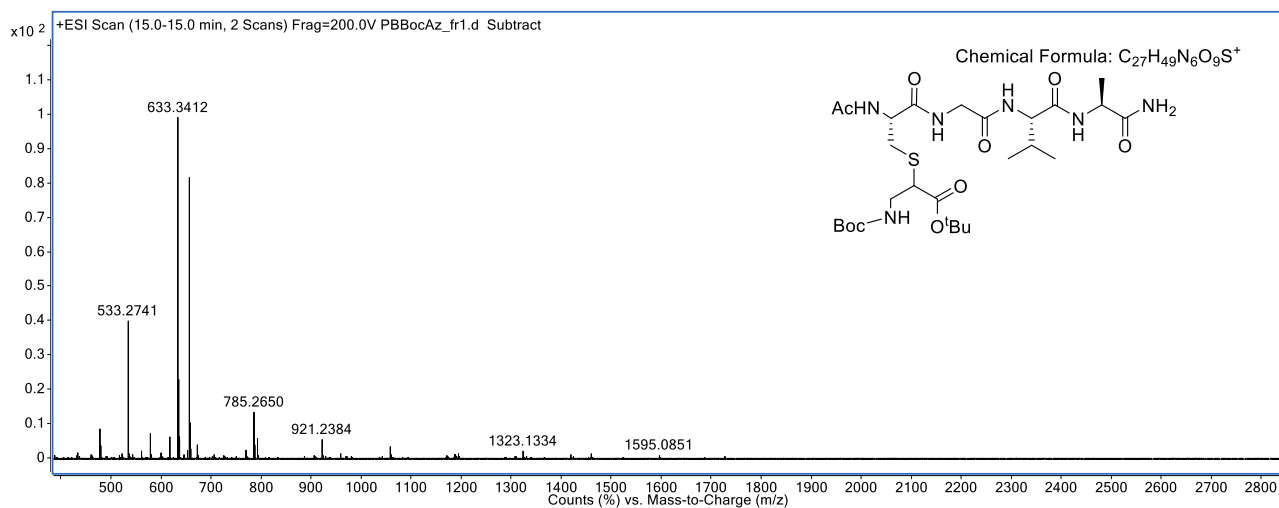

## Compound 2a strategy A

AcLanGlyProAlaNH<sub>2</sub>

A. HPLC profile of the reaction crude product:

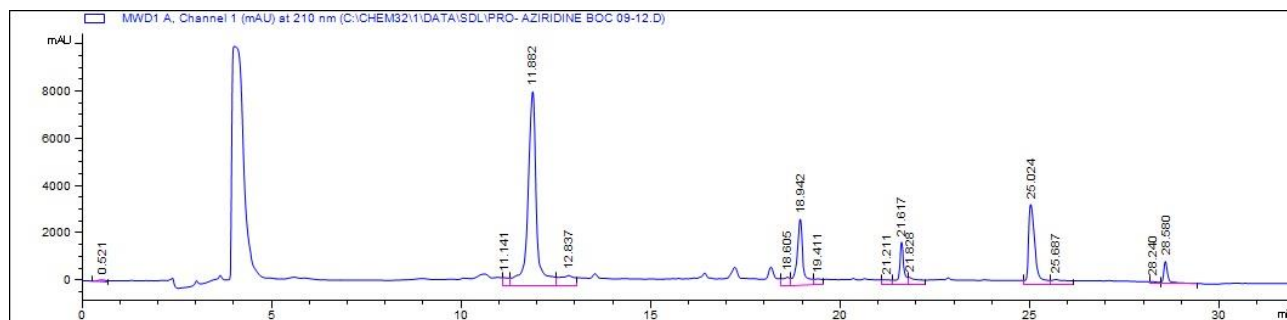

B. MS spectrum of **2a** after purification:

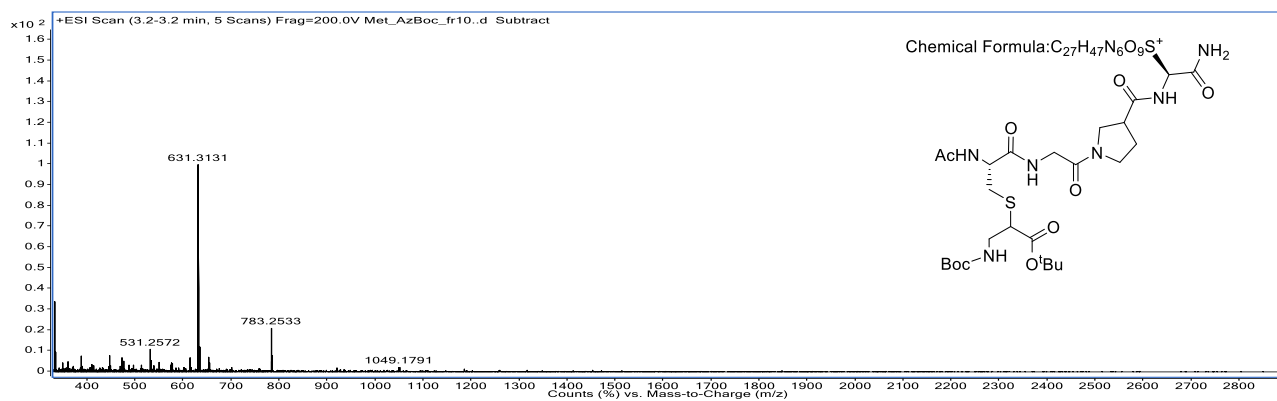

## Compound 3a strategy A

### AcLanGlyTyrAlaNH<sub>2</sub>

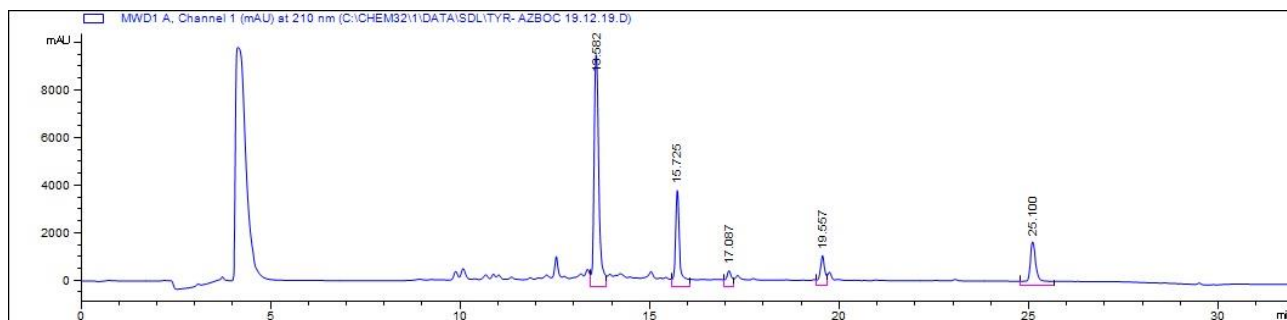

A. HPLC profile of the reaction crude product:

B. MS spectrum of **3a** after purification:

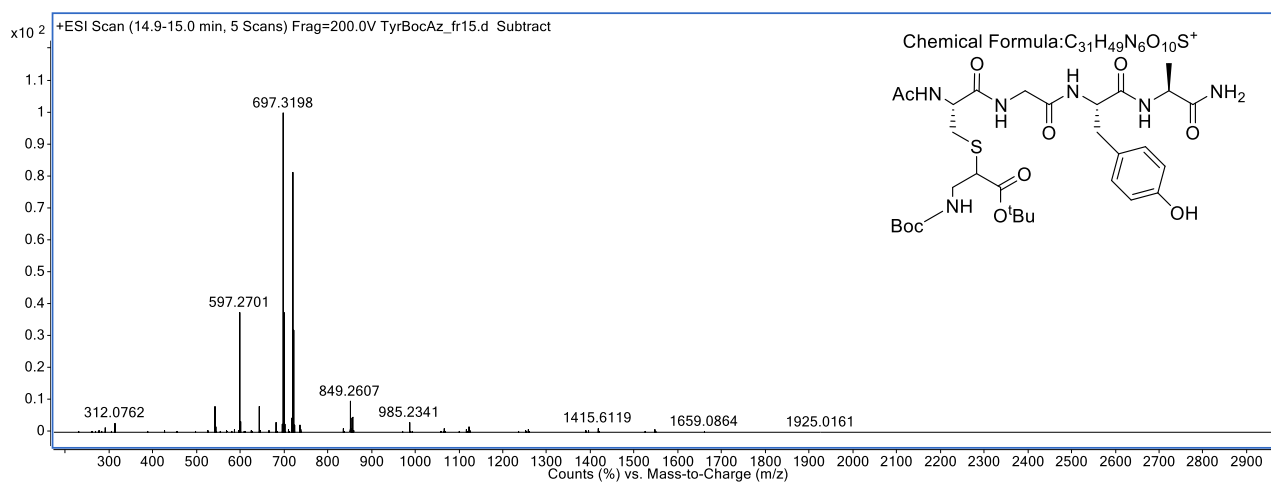

**Compound 4a strategy A**  
Ac**Lan**GlyHisAlaNH<sub>2</sub>

A. HPLC profile of the reaction crude product:

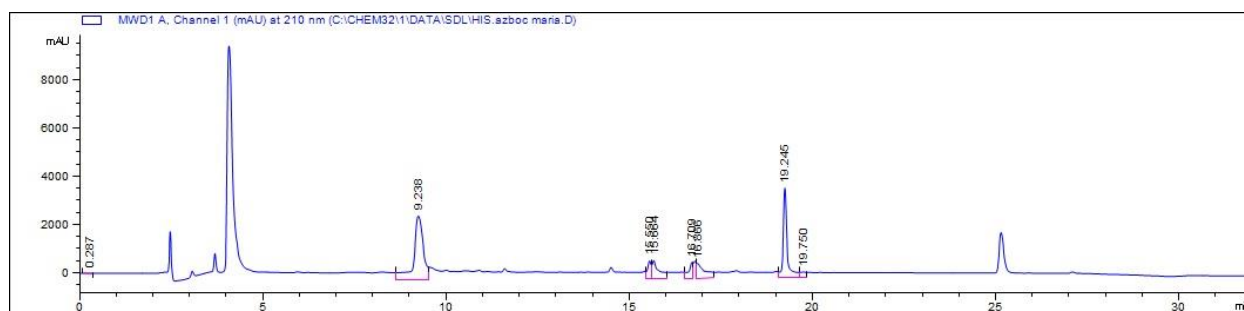

B. MS spectrum of **4a** after purification:

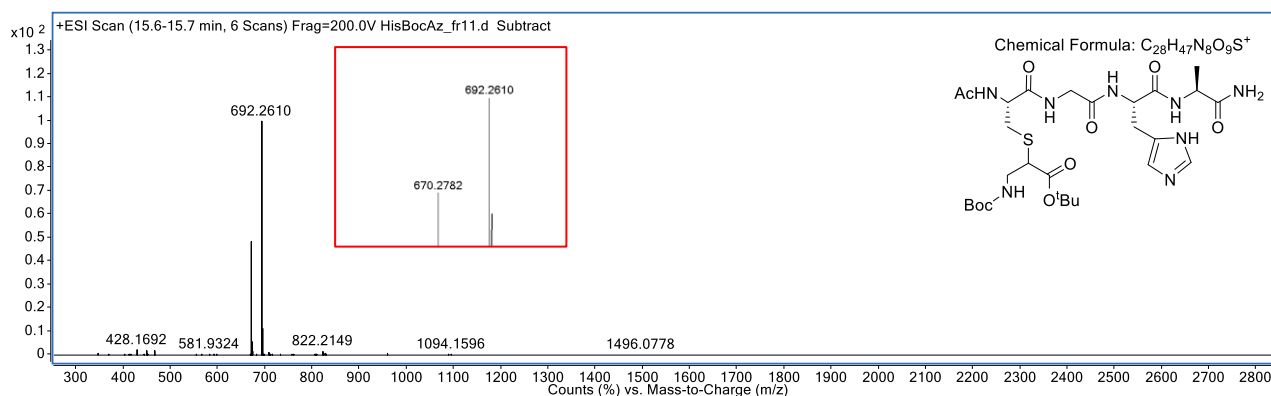

## Compound 5a strategy A

### AcLanGlyMetValAlaNH<sub>2</sub>

A. HPLC profile of the reaction crude product:

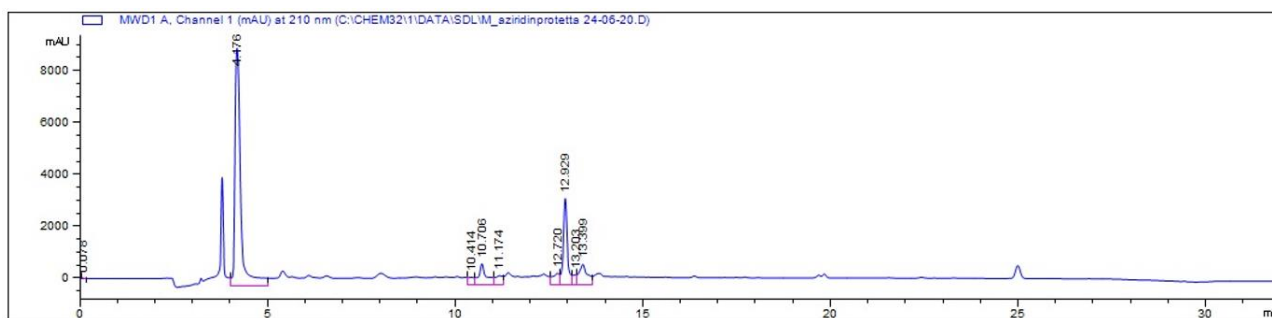

B. MS spectrum of **5a** after purification:

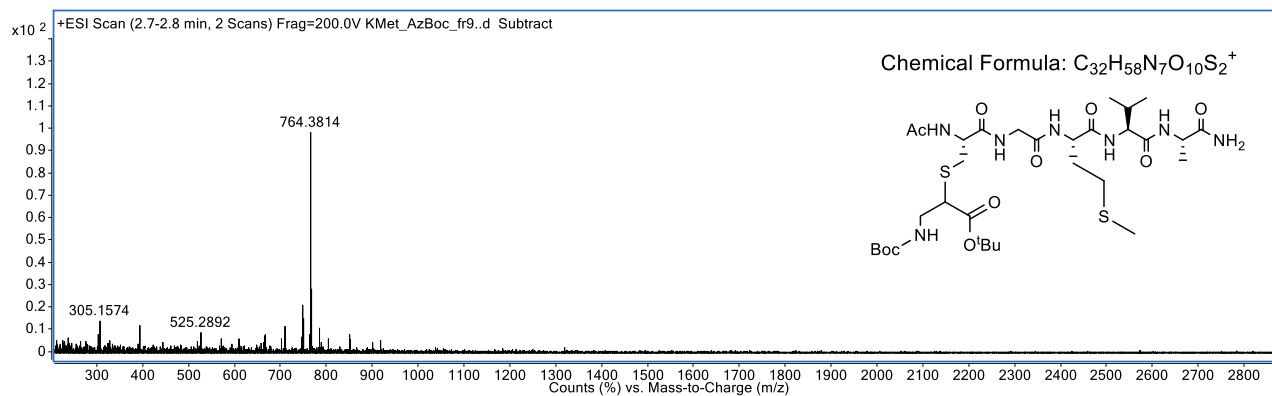

## Compound 6a strategy A

AcGlyTrpLanHisValAlaNH<sub>2</sub>

A. HPLC profile of the reaction crude product:

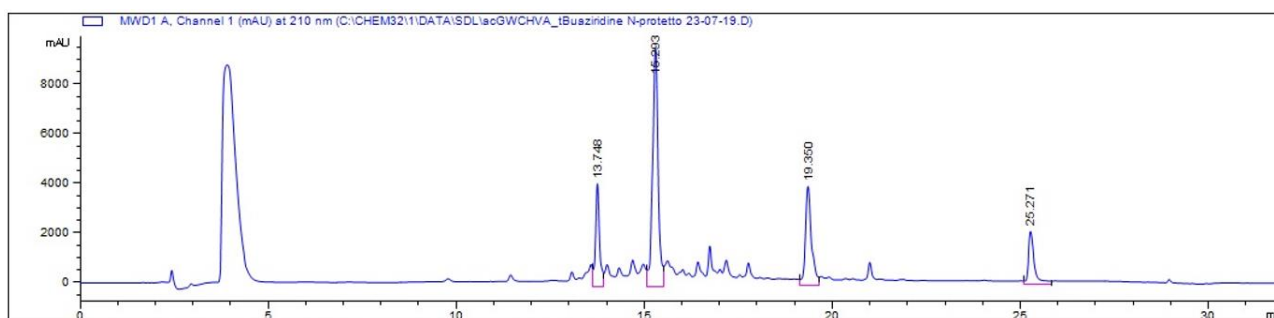

B. MS spectrum of **6a** after purification:

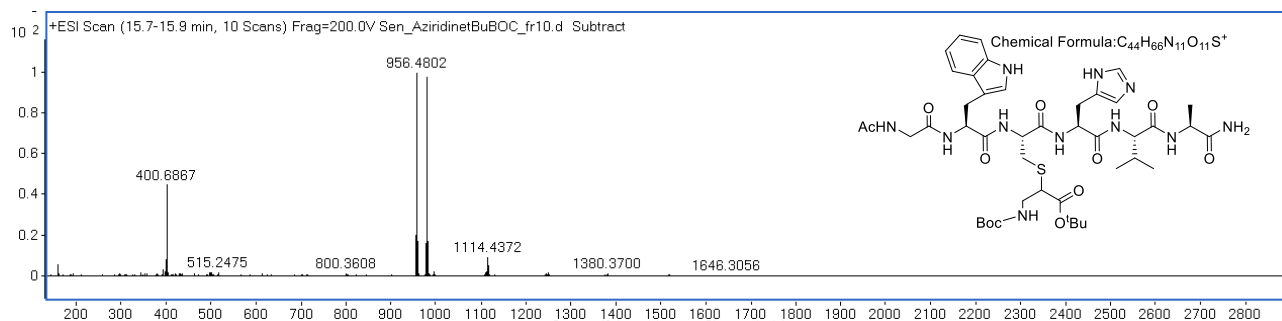

C.  $^1\text{H}$ -NMR (600 MHz,  $\text{dms}\text{-d}_6$ , 300 K).

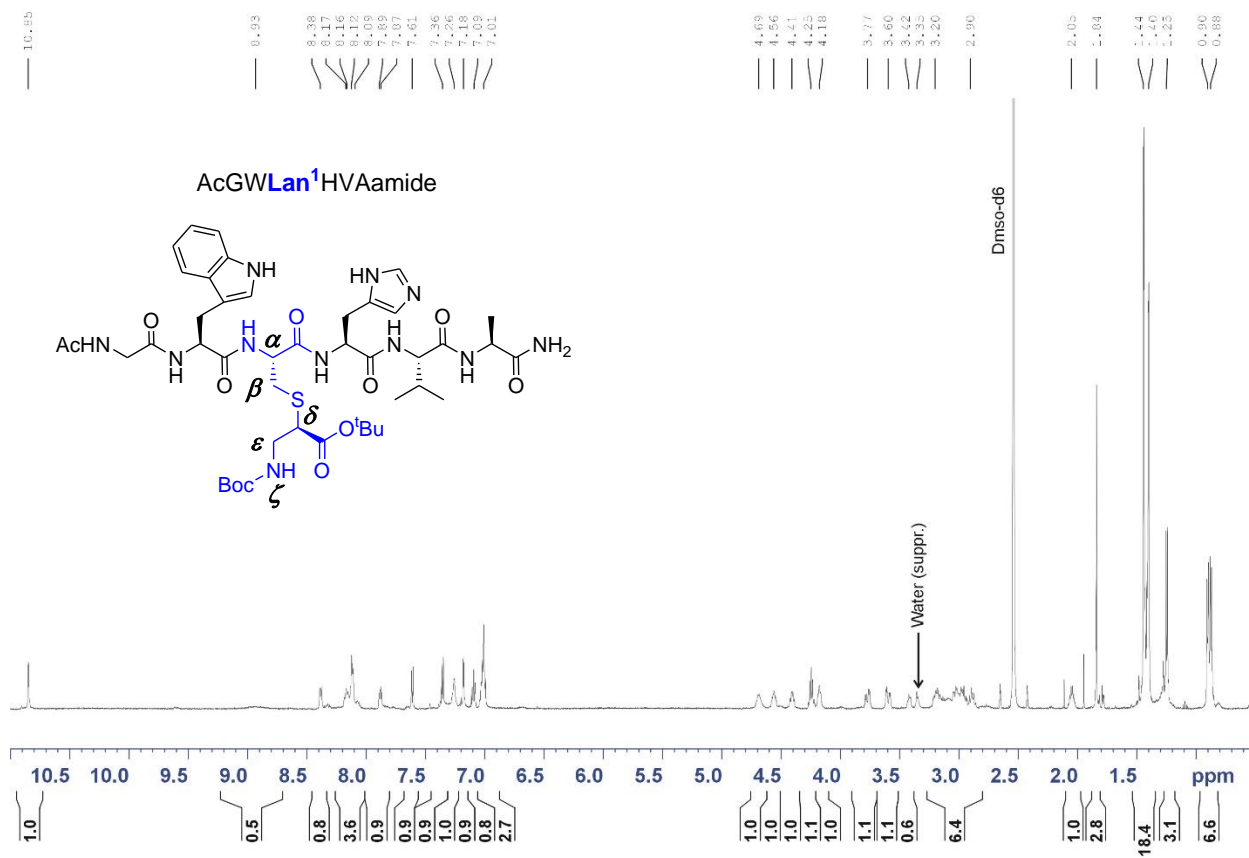

**Compound 6a strategy B**  
AcGlyTrp**Lan**HisValAlaNH<sub>2</sub>

A. HPLC profile of the reaction crude product:



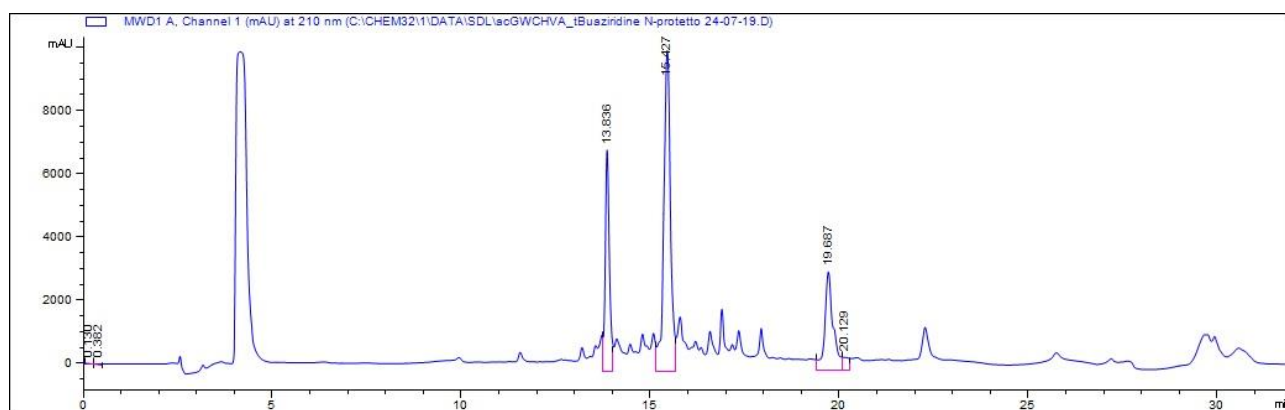

## Abbreviations

Boc: *Tert*-butoxycarbonyl

DBU: 1,8-diazabicyclo[5.4.0]undec-7-ene

DCM: Dichloromethane

DIPEA: Diisopropylethylamine

DMF: *N,N*-Dimethylformamide

DMSO-*d*<sub>6</sub>: Dimethylsulfoxide-*d*<sub>6</sub>

Fmoc: 9-Fluorenylmethoxycarbonyl

HOBt: *N*-hydroxybenzotriazole

PyBOP: Benzotriazol-1-yl-oxy-tris-pyrrolidino-phosphonium

*t*Bu: *Tert*-butyl

TFA: Trifluoroacetic acid

TEA: Triethylamine

TIS: Triisopropylsilane
